# Supplementary material for: Genetically based low oxygen affinities of felid hemoglobins: lack of biochemical adaptation to high-altitude hypoxia in the snow leopard
Source: Oxford University Press journal article supplement (doi:10.1242/jeb.125369), 2015-08-01
Supplement: jeb125369supp.pdf [file jeb125369supp.pdf]

Table S1. Sequences of adult-expressed  $\alpha$ - and  $\beta$ -type globin genes that were used in the reference alignment.

| Species                                        | GenBank accession number | Label                       |
|------------------------------------------------|--------------------------|-----------------------------|
| Human, <i>Homo sapiens</i>                     | NG_000006                | Human <i>HBA</i>            |
|                                                | NG_000007                | Human <i>HBD</i>            |
|                                                | NG_000007                | Human <i>HBB</i>            |
| Dog, <i>Canis lupus familiaris</i>             | ENSCAFG00000029904       | Dog <i>HBA</i>              |
|                                                | AC127473                 | Dog <i>HBD-T1</i>           |
|                                                | AC127473                 | Dog <i>HBD-T2</i>           |
|                                                | AC127473                 | Dog <i>HBB/D</i>            |
| Ferret, <i>Mustela putorius furo</i>           | AC232652                 | Ferret <i>HBA</i>           |
|                                                | AC231452                 | Ferret <i>HBD-T1</i>        |
|                                                | AC231452                 | Ferret <i>HBD-T2</i>        |
|                                                | AC231452                 | Ferret <i>HBB/D</i>         |
| Cat, <i>Felis catus</i>                        | AC219132                 | Cat <i>HBA</i>              |
|                                                | AC129072                 | Cat <i>HBB/D</i>            |
|                                                | AC129072                 | Cat <i>HBB</i>              |
| Siberian tiger, <i>Panthera tigris altaica</i> | ATCQ01121671             | Siberian tiger <i>HBA</i>   |
|                                                | XXXX (pending)           | Siberian Tiger <i>HBB/D</i> |
|                                                | ATCQ01114550             | Siberian tiger <i>HBB</i>   |
| Snow leopard, <i>Panthera uncia</i>            | XXXX (pending)           | Snow leopard <i>HBA</i>     |
|                                                | XXXX (pending)           | Snow leopard <i>HBB/D</i>   |
|                                                | AC129072                 | Snow leopard <i>HBB</i>     |
| African lion, <i>Panthera leo</i>              | P18975                   | African lion <i>HBA</i>     |
|                                                | XXXX (pending)           | African lion <i>HBB/D</i>   |
|                                                | P68050                   | African lion <i>HBB</i>     |
| Leopard, <i>Panthera pardus</i>                | P63110                   | Leopard <i>HBA</i>          |
|                                                | XXXX (pending)           | Leopard <i>HBB/D</i>        |
|                                                | 1206295B                 | Leopard <i>HBB</i>          |
| Jaguar, <i>Panthera onca</i>                   | P63109                   | Jaguar <i>HBA</i>           |
|                                                | XXXX (pending)           | Jaguar <i>HBB/D</i>         |
|                                                | P68064                   | Jaguar <i>HBB</i>           |
